# Supplementary material for: Bilayers directly scrolling up to form nanotubes via self-assembly of an achiral small molecule
Source: Royal Society of Chemistry journal article supplement (doi:10.1039/c6nr09269a), 2016-12-22
Supplement: c6nr09269a1.pdf [file c6nr09269a1.pdf]

## **Supporting Information**

### **Bilayers directly scrolling up to nanotubes via self-assembly of an achiral small molecule**

Yajun Zhang, Shuai Wang, Yanfeng Liu, Yingzhi Jin, Yijun Xia, Bo Song\*

Suzhou Key Laboratory of Macromolecular Design and Precision Synthesis, State and  
Local Joint Engineering Laboratory for Novel Functional Polymeric Materials, College  
of Chemistry, Chemical Engineering and Materials Science, Soochow University,  
Suzhou 215123, China.

E-mail: [songbo@suda.edu.cn](mailto:songbo@suda.edu.cn)

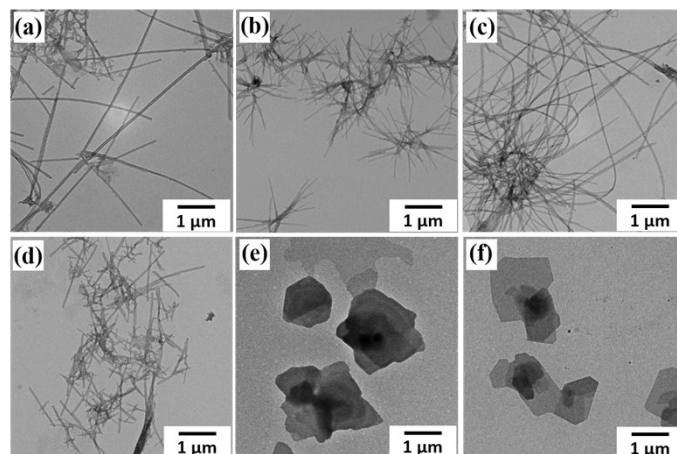

**Fig. S1** TEM images of aggregates formed by ABA11 in ethanol: (a)  $2.5 \times 10^{-4} \text{ mol L}^{-1}$ , (b)  $5 \times 10^{-4} \text{ mol L}^{-1}$ , (c)  $8 \times 10^{-4} \text{ mol L}^{-1}$ , (d)  $1 \times 10^{-3} \text{ mol L}^{-1}$ , (e)  $2.5 \times 10^{-3} \text{ mol L}^{-1}$ , (f)  $5 \times 10^{-3} \text{ mol L}^{-1}$ .

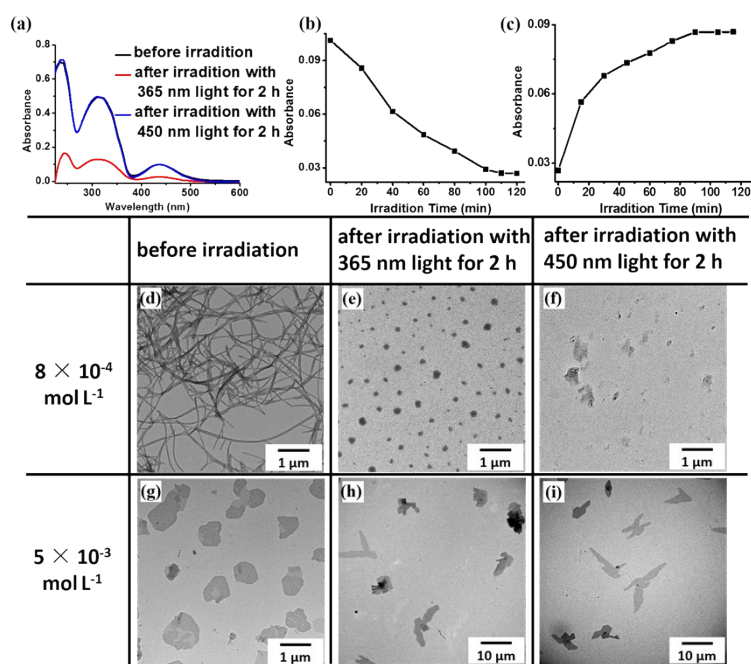

**Fig. S2** (a) UV-vis spectra of ABA11 in ethanol before irradiation, after irradiation with 365 nm light and then irradiation with 450 nm light. (b) Plot of absorbance at 438 nm versus irradiation (365 nm) duration to the as-prepared solution. (c) Plot of absorbance at 438 nm versus irradiation (450 nm) duration to the solution irradiated with 365 nm light for 2 h. (d)-(i) TEM images of ABA11 in ethanol before and after irradiation. All the irradiation durations were 2h. Rows of (d)-(f) and (g)-(i) show the structures from solutions with concentration of  $8 \times 10^{-4}$  and  $5 \times 10^{-3} \text{ mol L}^{-1}$ , respectively.
